# Supplementary material for: Dft Based Photophysical Assessment of Novel 2-substituted-3-pyridin-2-yl-benzo-[d][1,3]-azaphosphole P-oxide for Organic Optoelectronic Applications
Source: Research Square preprint supplement (doi:10.21203/rs.3.rs-8541791/v1), 2026-01-16
Supplement: Supplementary file 1 [file cd9b62bd19a4c0ca96a9d641.docx]

**Shoaib PY-BAPOs (1-9) and comparison of PH-BAPOs [SUPPORTING INFO]**

Table of Contents for supporting info

[**Table ST 1: Selected Bond Lengths and Bond Angles (BL1-BL4, BA1-BA2 & DHA1) for BAPO derivatives (1-9) in SP & GP** 2](#_Toc218692054)

[**Table ST2: Single Point Energies (GS, ES, M+, M−) in Hartree for SP and GP** 5](#_Toc218692055)

[**Table ST 3: Molecular Formula and Molecular Weight of PY-BAPOS 1-9** 6](#_Toc218692056)

[**Table ST 4: Absorption Wavelengths (λabs), Oscillator Strengths, Transitions, and Chemical Shifts GP for PY BAPOs (1-9)** 6](#_Toc218692057)

[**Table ST5: comparison of Absorption profile of PH and PY BAPOs (1-9) in SP** 7](#_Toc218692058)

[**Table ST6: comparison of Absorption profile of PH and PY BAPOs (1-9) in GP** 8](#_Toc218692059)

[**Table ST 7: Emission Wavelengths (λfluo), Oscillator Strengths, Transitions, Stokes Shifts and tau at GP for PY BAPOs (1-9)** 9](#_Toc218692060)

[**Table ST8: comparison of Fluorescence profile of PH and PY BAPOs (1-9) in SP** 9](#_Toc218692061)

[**Table ST9: comparison of Fluorescence profile of PH and PY BAPOs (1-9) in GP** 11](#_Toc218692062)

[**Table ST 10: NBO (natural bond orbitals charges) of PY-BAPOS 1-9** 12](#_Toc218692063)

[**Table ST 11: comparison of natural bond orbitals of PH and PY BAPOs (1-9) in SP** 12](#_Toc218692064)

[**Table ST 12: H-3 to L+3 values in eV of PY-BAPOs 1-9 In SP and GP** 13](#_Toc218692065)

[**Table ST13: comparison of energies (eV) for HOMO, LUMO & Energy gaps of PH and PY BAPOs (1-9) in SP** 14](#_Toc218692066)

[**Table ST14: comparison of energies in eV (HOMO-1) and (LUMO+1) of PH and PY BAPOs (1-9) in SP** 14](#_Toc218692067)

[**Table ST 15: Fragment Contributions to HOMO and LUMO in Gas Phase for PY BAPOs (1-9)** 15](#_Toc218692068)

[**Table ST 16: Comparison of fragment Contributions % to HOMO and LUMO Levels of PH-BAPOs & PY-BAPOs in SP and GP** 15](#_Toc218692069)

[**Table ST 17: HOMO-LUMO Energy Offset (ΔE(H), ΔE(L)) for Donor-Acceptor Matching at GP for PY BAPOs (1-9)** 16](#_Toc218692070)

[**TABLE ST 18: Reactivity Descriptors and Transport Properties: IP, EA, λh, λe, GH, DM, β at GP for PY BAPOs (1-9)** 17](#_Toc218692071)

[**Table ST 19: comparison of Polarizability (α), hyperpolarizability (β) and dipole moment (µ) of PH and PY BAPOs (1-9) in SP & GP** 17](#_Toc218692072)

[**Table ST 20: comparison of reorganization energy of electron (λe), reorganization energy of hole (λh), Global Hardness (H), Globel electrophilicity index (ω) of PH and PY BAPOs (1-9) in SP** 18](#_Toc218692073)

[**Table ST21: comparison of reorganization energy of electron (λe), reorganization energy of hole (λh) and Global Hardness (H) of PH and PY BAPOs (1-9) in GP** 19](#_Toc218692074)

[**Table ST22: comparison of Hole and Electron transfer (integrals and potentials) of PH and PY BAPOs (1-9) in SP** 20](#_Toc218692075)

[**Figure SF 1: ChemDraw Illustration of Key Bond Lengths and Bond Angles across PY-BAPO Derivatives (1-9)** 21](#_Toc218692076)

[**Figure SF 2: Identification of Fragments (APO, PY, AR) For 1-9** 22](#_Toc218692077)

[**Figure SF 3: Absorption Spectra of Selected Molecules (1-9) in GP** 22](#_Toc218692078)

[**Figure SF 4: Emission Spectra of Selected Molecules (1-9) in GP** 23](#_Toc218692079)

[**Figure SF 5: Absorption & Emission Maxima of Selected Molecules (1-9) in SP/GP of PY-BAPOs .** 23](#_Toc218692080)

[**Figure SF 6: Comparison of Emission Maxima of Selected Molecules (1-9) in SP/GP of PH/PY-BAPOs .** 24](#_Toc218692081)

[**Figure SF 7: Comparison of PH/PY-BAPOs for HOMO LUMO %age fragment contribution.** 24](#_Toc218692082)

[**Figure SF 8: FMO Offset comparison with E1-3 & H1-3 PY-BAPO derivatives (1-9)** 25](#_Toc218692083)

[**Figure SF 9: Reorganization energies for holes & electrons of molecules (1-9) in SP of PY-BAPOs.** 26](#_Toc218692084)

[**Figure SF 10: Comparison of PH/PY-BAPOs for hyperpolarizability in SP/GP.** 26](#_Toc218692085)

### **Table ST 1: Selected Bond Lengths and Bond Angles (BL1-BL4, BA1-BA2 & DHA1) for BAPO derivatives (1-9) in SP & GP**

| SP FLU |  | 1 | 2 | 3 | 4 | 5 | 6 | 7 | 8 | 9 |
| --- | --- | --- | --- | --- | --- | --- | --- | --- | --- | --- |
| BL1 | 1.086 | 1.351 | 1.713 | 1.864 | 1.504 | 1.423 | 1.486 | 1.448 | 1.489 |
| BL2 | 1.429 | 1.43 | 1.456 | 1.454 | 1.429 | 1.465 | 1.43 | 1.467 | 1.443 |
| BL3 | 1.83 | 1.834 | 1.805 | 1.808 | 1.844 | 1.874 | 1.827 | 1.878 | 1.818 |
| BL4 | 1.515 | 1.515 | 1.521 | 1.521 | 1.514 | 1.51 | 1.515 | 1.507 | 1.521 |
| GP FLU | BL1 | 1.086 | 1.352 | 1.763 | 1.916 | 1.505 | 1.427 | 1.487 | 1.449 | 1.487 |
| BL2 | 1.429 | 1.428 | 1.427 | 1.427 | 1.426 | 1.465 | 1.431 | 1.46 | 1.466 |
| BL3 | 1.89 | 1.895 | 1.897 | 1.897 | 1.901 | 1.876 | 1.883 | 1.832 | 1.879 |
| BL4 | 1.514 | 1.514 | 1.514 | 1.514 | 1.515 | 1.506 | 1.514 | 1.511 | 1.503 |
| SP FLU | BA₁ | 119.669 | 118.759 | 117.092 | 116.819 | 120.463 | 122.53 | 120.048 | 121.01 | 118.48 |
| BA₂ | 126.04 | 125.929 | 125.657 | 125.624 | 120.057 | 124.06 | 126.008 | 124.56 | 125.16 |
| *DHA1* | 0.758 | 1.322 | -14.669 | -12.97 | 3.29 | -7.061 | -0.368 | -14.76 | -1.638 |
| GP FLU | BA₁ | 119.267 | 118.39 | 118.829 | 118.74 | 119.949 | 122.176 | 119.42 | 118.77 | 119.44 |
| BA₂ | 125.94 | 125.7 | 125.77 | 125.74 | 125.62 | 123.79 | 126.01 | 125.11 | 124.14 |
| *DHA1* | -0.314 | -1.556 | -1.844 | -1.635 | -1.606 | -6.82 | 1.129 | -11.06 | -14.76 |
| SP | BL1 | 1.086 | 1.352 | 1.763 | 1.916 | 1.504 | 1.468 | 1.486 | 1.484 | 1.489 |
| BL2 | 1.465 | 1.466 | 1.467 | 1.454 | 1.467 | 1.465 | 1.465 | 1.466 | 1.466 |
| BL3 | 1.881 | 1.88 | 1.88 | 1.88 | 1.88 | 1.881 | 1.881 | 1.881 | 1.881 |
| BL4 | 1.508 | 1.508 | 1.508 | 1.508 | 1.508 | 1.509 | 1.508 | 1.508 | 1.508 |
| GP | BL1 | 1.086 | 1.349 | 1.759 | 1.913 | 1.506 | 1.467 | 1.486 | 1.484 | 1.489 |
| BL2 | 1.465 | 1.466 | 1.467 | 1.467 | 1.467 | 1.465 | 1.465 | 1.465 | 1.466 |
| BL3 | 1.88 | 1.879 | 1.879 | 1.879 | 1.879 | 1.88 | 1.881 | 1.88 | 1.88 |
| BL4 | 1.504 | 1.504 | 1.503 | 1.503 | 1.503 | 1.505 | 1.504 | 1.504 | 1.503 |
| SP OF | BA₁ | 119.72 | 118.57 | 119.04 | 118.98 | 119.86 | 120.75 | 119.9 | 119.91 | 119.53 |
| BA₂ | 124.29 | 124.34 | 124.42 | 124.44 | 124.41 | 124.26 | 124.22 | 124.2 | 124.22 |
| *DHA1* | -11.85 | -13.219 | -13.6 | -13.21 | -13.33 | 1.218 | -11.29 | -13.15 | -12.79 |
| GP OF | BA₁ | 119.7 | 118.73 | 119.21 | 119.14 | 119.85 | 120.72 | 119.79 | 119.87 | 119.47 |
| BA₂ | 124.11 | 124.14 | 124.28 | 124.28 | 124.28 | 124.01 | 124.02 | 124.05 | 124.08 |
| *DHA1* | -14.4 | -14.63 | -14.54 | -14.2 | -13.75 | 0.406 | -14.24 | -14.44 | -14.52 |

- **PY-1**L₁: C₁₇H₂₁ (1-2), C₁₇F₃₅ (3), C₁₇Cl₃₅ (4), C₁₇Br₃₅ (5), C₁₇C₃₄ (6), C₁₅C₁₁ (7), C₆C₄ (8), C₁₅C₃₄ (9),
- **PY-2**L₂: C₁₂C₂₃ (1-2), C₁₂C₂₂ (3), C₁₂C₂₂ (4), C₁₂C₂₂ (5), C₁₂C₂₂ (6), C₂₅C₂₀ (7), C₁₆C₁₁ (8), C₁₂C₂₂ (9),
- **PY-3**L₃: P₁₁C₂₃ (1-2), P₁₁C₂₂ (3), P₁₁C₂₂ (4), P₁₁C₂₂ (5), P₁₁C₂₂ (6), P₂₉C₂₅ (7), P₂₀C₁₆ (8), P₁₁C₂₂ (9),
- **PY-4**L₄: P₁₁O₂₅ (1-2), P₁₁O₂₄ (3), P₁₁O₂₄ (4), P₁₁O₂₄ (5), P₁₁O₂₄ (6), P₂₉O₃₀ (7), P₂₀O₂₁ (8), P₁₁O₂₄ (9),
- **PY-5**A₁: C₁₄C₁₇H₂₁ (1-2), C₁₄C₁₇F₃₅ (3), C₁₄C₁₇Cl₃₅ (4), C₁₄C₁₇Br₃₅ (5), C₁₄C₁₇C₃₄ (6), C₁₁C₁₅C₁₇ (7), C₈C₆C₄ (8), C₁₃C₁₅C₃₄ (9),
- **PY-6**A₂: P₁₁C₂₃C₁₂ (1-2), P₁₁C₂₂C₁₂ (3), P₁₁C₂₂C₁₂ (4), P₁₁C₂₂C₁₂ (5), P₁₁C₂₂C₁₂ (6), P₂₉C₂₅C₂₀ (7), P₂₀C₁₆C₁₁ (8), P₁₁C₂₂C₁₂ (9),
- *DHA1*: P₁₁C₂₃C₁₂C₁₄ (1-2), P₁₁C₂₂C₁₂C₁₄ (3), P₁₁C₂₂C₁₂C₁₄ (4), P₁₁C₂₂C₁₂C₁₄ (5), P₁₁C₂₂C₁₂C₁₄ (6), P₂₉C₂₅C₂₀C₁₇ (7), P₂₀C₁₆C₁₁C₈ (8), P₁₁C₂₂C₁₂C₁₄ (9),

The molecular geometries of azaphosphole derivatives 1-9, incorporating a 3-(pyridin-2-yl)benzo[d][1,3]azaphosphole 3-oxide core, were optimized at the ground state in both gas phase (GP) and solvent phase (SP, IEFPCM using chlorobenzene). The influence of substitution at the 2-POsition was evaluated by analyzing key bond lengths (BL₁-BL₄), bond angles (BA₁-BA₂), and a characteristic dihedral angle (*DHA1*), with an emphasis on how these structural parameters affect conjugation, rigidity, and molecular planarity. The bond BL₁, which connects the azaphosphole ring to the aryl or heteroaryl substituent, showed the broadest variation across the series. In the SP, BL₁ ranged from 1.086 Å (compound 1) to 1.916 Å (compound 4), reflecting the influence of substituent identity. The minimal value in compound 1 corresponds to an unsubstituted phenyl ring, while the maximal length in compound 4 arises from bromine substitution, attributable to the increased van der Waals radius and polarizability of bromine. PY-BAPOS 6-9, containing thiophene, benzothiazole and extended π-conjugated systems, showed intermediate BL₁ value (1.468-1.489 Å), indicate effective conjugation and relatively planar linkages. The internal aromatic BL₂, involving C-C bonds within the linker phenyl or heterocyclic ring, remained virtually constant across all PY-BAPOS and phases, with values between 1.454 Å and 1.467 Å. This invariance points to preserved aromaticity and rigidity of the π-framework, regardless of substitution. Similarly, BL₃, the bond between phosphorus and the adjacent carbon (P-C), remained consistent, with values averaging 1.880-1.881 Å in SP and only marginally shorter in GP. The phosphoryl bond (BL₄), corresponding to the P=O linkage, was also highly stable, consistently measuring 1.508 Å in SP and slightly shorter (1.503-1.504 Å) in GP. This uniformity of BL₃ and BL₄ confirms the structural resilience of the phosphine oxide core and its electronic insulation from peripheral substitutions. Bond angle BA₁, defined by the substituent linkage to the core aryl unit, varied slightly between 118.57° and 120.75° in the SP. Derivatives with fused thiophene systems (e.g., compound 6) displayed wider BA₁ angles due to planarization and extended conjugation, whereas halogenated PY-BAPOS (2-4) showed narrower angles, potentially due to lone pair-π interactions or weak steric repulsion. The BA₂ angle, centered about the phosphorus atom and its adjacent carbons, remained within a narrow range of 124.2°-124.4°, regardless of substitution or phase, indicating that the phosphorus center maintains a consistent tetrahedral distortion. The dihedral angle *DHA1*, a key measure of torsional strain between the azaphosphole ring and the substituent, revealed greater sensitivity to substitution. In non-heterocyclic PY-BAPOS (1-5), *DHA1* ranged from -11.85° to -13.6° in SP and -13.75° to -14.63° in GP, indicating mild twisting that could reduce π-orbital overlap and affect charge mobility. In contrast, compound 6 showed a positive *DHA1* of +1.218° (SP) and +0.406° (GP), reflecting nearly complete coplanarity; a favorable structural trait for π-conjugated systems. Compound 8 also exhibited a relatively low *DHA1* of -11.29°, suggesting enhanced rigidity and conjugation, while the remaining thiophene-substituted systems (9) retained moderate torsion (-13.15° to -14.52°).

Summarizing, the ground-state geometries support the notion that PY-BAPOs 6 and 8, characterized by minimal dihedral twisting and extended π-systems, are structurally optimized for efficient intramolecular charge transfer (ICT) and potential hole-transport applications. Meanwhile, halogenated derivatives (2-5) display steric-induced deviations yet retain sufficient backbone rigidity and planarity to support charge separation and electron transport. The invariance of BL₃ and the phosphoryl (P=O) bond (BL₄) across all derivatives and phases reinforces the chemical stability of the phosphine oxide framework and its suitability for integration into optoelectronic devices. These geometric trends, when considered alongside electronic and optical data, enable a holistic understanding of how structural features govern functional performance, providing a rational basis for molecular design in applications such as organic solar cells, OLEDs, and nonlinear optical materials.

### **Table ST2: Single Point Energies (GS, ES, M+, M−) in Hartree for SP and GP**

| **Energies in Hartree** | | | | | | | | |
| --- | --- | --- | --- | --- | --- | --- | --- | --- |
| **PY** | **GAS PHASE** | | | | **SOLVENT PHASE** | | | |
|  | **S0** | **S1** | **M+** | **M-** | **S0** | **S1** | **M+** | **M-** |
| 1 | -1219.9 | -1219.7 | -1219.6 | -1219.9 | -1219.9 | -1219.7 | -1219.6 | -1220 |
| 2 | -1319.1 | -1319 | -1318.8 | -1319.1 | -1319.1 | -1319 | -1318.9 | -1319.2 |
| 3 | -1679.5 | -1679.3 | -1679.2 | -1679.5 | -1679.5 | -1679.3 | -1679.2 | -1679.6 |
| 4 | -3791 | -3790.8 | -3790.7 | -3791 | -3791 | -3790.8 | -3790.7 | -3791.1 |
| 5 | -1556.9 | -1556.8 | -1556.6 | -1556.9 | -1556.9 | -1556.8 | -1556.7 | -1557 |
| 6 | -1925.3 | -1925.2 | -1925.1 | -1925.4 | -1925.3 | -1925.2 | -1925.1 | -1925.4 |
| 7 | -2246.1 | -2245.9 | -2245.8 | -2246.1 | -2246.1 | -2246 | -2245.9 | -2246.2 |
| 8 | -1941.4 | -1941.2 | -1941.1 | -1941.4 | -1941.4 | -1941.3 | -1941.2 | -1941.5 |
| 9 | -1957.4 | -1957.3 | -1957.1 | -1957.4 | -1957.4 | -1957.3 | -1957.2 | -1957.5 |

### **Table ST 3: Molecular Formula and Molecular Weight of PY-BAPOS 1-9**

| **PY** | **MF** | **M.WT** | **Nomenclature** |
| --- | --- | --- | --- |
| 1 | C18H13N2OP | 304.28 | 2-phenyl-3-(pyridin-2-yl)benzo[d][1,3]azaphosphole 3-oxide |
| 2 | C18H12FN2OP | 322.27 | 2-(3-fluorophenyl)-3-(pyridin-2-yl)benzo[d][1,3]azaphosphole 3-oxide |
| 3 | C18H12ClN2OP | 338.72 | 2-(3-chlorophenyl)-3-(pyridin-2-yl)benzo[d][1,3]azaphosphole 3-oxide |
| 4 | C18H12rN2OP | 383.17 | 2-(3-bromophenyl)-3-(pyridin-2-yl)benzo[d][1,3]azaphosphole 3-oxide |
| 5 | C19H12F3N2OP | 372.28 | 3-(pyridin-2-yl)-2-(3-(trifluoromethyl)phenyl)benzo[d][1,3]azaphosphole 3-oxide |
| 6 | C26H17N2OPS | 436.46 | 2-(3-(benzo[c]thiophen-1-yl)phenyl)-3-(pyridin-2-yl)benzo[d][1,3]azaphosphole 3-oxide |
| 7 | C24H15N2OPS2 | 442.49 | 3-(pyridin-2-yl)-2-(3-(thieno[3,2-b]thiophen-2-yl)phenyl)benzo[d][1,3]azaphosphole 3-oxide |
| 8 | C25H16N3OPS | 437.45 | 2-(3-(benzo[d]thiazol-7-yl)phenyl)-3-(pyridin-2-yl)benzo[d][1,3]azaphosphole 3-oxide |
| 9 | C24H15N4OPS | 438.44 | 2-(3-(benzo[c][1,2,5]thiadiazol-4-yl)phenyl)-3-(pyridin-2-yl)benzo[d][1,3]azaphosphole 3-oxide |

### **Table ST 4: Absorption Wavelengths (λabs), Oscillator Strengths, Transitions, and Chemical Shifts GP for PY BAPOs (1-9)**

| GP ABS | λnm | *f* | H→L (T %) | CS | LHE |
| --- | --- | --- | --- | --- | --- |
| 1 | 350 | 0.33 | 66 | -- | 56 |
| 2 | 351 | 0.316 | 65 | 1 | 56 |
| 3 | 351 | 0.320 | 65 | 1 | 58 |
| 4 | 352 | 0.314 | 65 | 2 | 57 |
| 5 | 350 | 0.319 | 65.4 | 0 | 59 |
| 6 | 378 | 0.298 | 52.5 | 28 | 52 |
| 7 | 309 | 0.472 | 59.1 | -40 | 76 |
| 8 | 360 | 0.269 | 68.9 | 9 | 40 |
| 9 | 357 | 0.181 | 66.1 | 7 | 49 |

### **Table ST5: comparison of Absorption profile of PH and PY BAPOs (1-9) in SP**

| SP |  | 1 | 2 | 3 | 4 | 5 | 6 | 7 | 8 | 9 |
| --- | --- | --- | --- | --- | --- | --- | --- | --- | --- | --- |
| *ABS* NM | *PH* | 361.5 | 362.3 | 361.8 | 362.8 | 360.4 | 384.3 | 371.2 | 384.2 | 363.8 |
| *PY* | 360.6 | 361.1 | 360.8 | 361.5 | 359.6 | 389.8 | 369.8 | 384.6 | 363.6 |
| ∆*PY*-*PH* | -0.88 | -1.22 | -0.99 | -1.24 | -0.86 | 5.41 | -1.42 | 0.41 | -0.22 |
| *ABS* OS | *PH* | 0.408 | 0.385 | 0.394 | 0.387 | 0.394 | 0.537 | 0.26 | 0.307 | 0.474 |
| *PY* | 0.364 | 0.362 | 0.379 | 0.368 | 0.394 | 0.625 | 0.227 | 0.297 | 0.431 |
| ∆*PY*-*PH* | -0.04 | -0.02 | -0.02 | -0.02 | 0 | 0.088 | -0.03 | -0.01 | -0.043 |
| *ABS* VIE | *PH* | 3.429 | 3.422 | 3.427 | 3.418 | 3.44 | 3.226 | 3.34 | 3.227 | 3.408 |
| *PY* | 3.438 | 3.433 | 3.436 | 3.43 | 3.448 | 3.181 | 3.353 | 3.224 | 3.41 |
| ∆*PY*-*PH* | 0.009 | 0.012 | 0.009 | 0.012 | 0.008 | -0.04 | 0.013 | -0.003 | 0.002 |
| *ABS* ORB# | *PH* | H>L | H>L | H>L | H>L | H>L | H>L+1 | H-3>L | H>L | H-1>L+1 |
| *PY* | H>L | H>L | H>L | H>L | H>L | H>L | H>L | H>L | H>L |
| *AB*S % | *PH* | 64.3 | 64.2 | 65 | 64.4 | 66 | 62.5 | 43.3 | 59.8 | 66.5 |
| *PY* | 57.9 | 58.9 | 60.1 | 59.1 | 62.4 | 64.5 | 47.3 | 61.3 | 63.2 |
| ∆*PY*-*PH* | -6.4 | -5.3 | -4.9 | -5.3 | -3.6 | 2 | 4 | 1.5 | -3.3 |

### **Table ST6: comparison of Absorption profile of PH and PY BAPOs (1-9) in GP**

| GP |  | 1 | 2 | 3 | 4 | 5 | 6 | 7 | 8 | 9 |
| --- | --- | --- | --- | --- | --- | --- | --- | --- | --- | --- |
| *ABS* NM | *PH* | 350 | 351.5 | 351.6 | 353 | 350 | 375.7 | 348.2 | 384.8 | 353.6 |
| *PY* | 350.3 | 351.3 | 351.4 | 352.4 | 350.1 | 378.7 | 360.1 | 357.8 | 353.4 |
| ∆*PY*-*PH* | 0.31 | -0.2 | -0.17 | -0.52 | 0.13 | 3.04 | 11.89 | -26.9 | -0.23 |
| *ABS* OS | *PH* | 0.326 | 0.306 | 0.306 | 0.292 | 0.305 | 0.294 | 0.255 | 0.183 | 0.243 |
| *PY* | 0.33 | 0.316 | 0.321 | 0.314 | 0.32 | 0.299 | 0.269 | 0.182 | 0.398 |
| ∆*PY*-*PH* | 0.004 | 0.011 | 0.015 | 0.022 | 0.015 | 0.005 | 0.014 | -0.002 | 0.155 |
| *ABS* VIE | *PH* | 3.542 | 3.527 | 3.527 | 3.513 | 3.543 | 3.3 | 3.561 | 3.222 | 3.506 |
| *PY* | 3.539 | 3.529 | 3.528 | 3.518 | 3.541 | 3.274 | 3.443 | 3.465 | 3.509 |
| ∆*PY*-*PH* | -0 | 0.002 | 0.002 | 0.005 | -0 | -0.03 | -0.12 | 0.243 | 0.002 |
| *ABS* ORB# | *PH* | H>L | H>L | H>L | H>L | H>L | H>L+1 | H-1>L | H>L | H-2>L+1 |
| *PY* | H>L | H>L | H>L | H>L | H>L | H>L+1 | H-3>L | H>L | H-1>L+1 |
| *AB*S % | *PH* | 66.4 | 66 | 66 | 66 | 66 | 61 | 62 | 65 | 51 |
| *PY* | 66 | 65 | 65.3 | 65.2 | 65.4 | 52.5 | 68.9 | 66.1 | 66.8 |
| ∆*PY*-*PH* | -0.4 | -1 | -0.7 | -0.8 | -0.6 | -8.5 | 6.9 | 1.1 | 15.8 |

### **Table ST 7: Emission Wavelengths (λfluo), Oscillator Strengths, Transitions, Stokes Shifts and tau at GP for PY BAPOs (1-9)**

| GP FLU | λflu (nm) | *f flu* | (T%) L→H | SS (nm) | Tau |
| --- | --- | --- | --- | --- | --- |
| 1 | 387 | 0.341 | 55.4 | 36 | 6.57 |
| 2 | 386 | 0.344 | 55.3 | 35 | 6.49 |
| 3 | 386 | 0.352 | 55.7 | 35 | 6.35 |
| 4 | 387 | 0.354 | 55.5 | 34 | 6.34 |
| 5 | 385 | 0.345 | 56.6 | 34 | 6.43 |
| 6 | 456 | 0.303 | 67.1 | 78 | 10.2 |
| 7 | 340 | 0.470 | 49.2 | 30 | 6.90 |
| 8 | 396 | 0.340 | 52.4 | 36 | 16.0 |
| 9 | 441 | 0.181 | 52 | 83 | 6.40 |

### **Table ST8: comparison of Fluorescence profile of PH and PY BAPOs (1-9) in SP**

| SP |  | 1 | 2 | 3 | 4 | 5 | 6 | 7 | 8 | 9 |
| --- | --- | --- | --- | --- | --- | --- | --- | --- | --- | --- |
| FLU NM | *PH* | 507 | 411 | 410 | 411 | 407 | 471 | 501 | 358 | 364 |
| *PY* | 506.1 | 509 | 440.1 | 442 | 515.6 | 480.8 | 505 | 357 | 470 |
| ∆*PY*-*PH* | -1 | 97.7 | 30.4 | 31 | 108 | 9.66 | 4.02 | -1.5 | 106 |
| FLU OS | *PH* | 0.29 | 0.24 | 0.27 | 0.3 | 0.29 | 0.41 | 0.44 | 0.4 | 0.5 |
| *PY* | 0.309 | 0.28 | 0.321 | 0.33 | 0.229 | 0.471 | 0.41 | 0.31 | 0.39 |
| ∆*PY*-*PH* | 0.02 | 0.04 | 0.05 | 0.1 | -0.1 | 0.06 | 0 | -0.1 | -0.1 |
| FLU VIE | *PH* | 2.44 | 3.02 | 3.03 | 3 | 3.04 | 2.63 | 2.48 | 3.5 | 3.4 |
| *PY* | 2.45 | 2.44 | 2.817 | 2.8 | 2.405 | 2.579 | 2.46 | 3.48 | 2.64 |
| ∆*PY*-*PH* | 0 | -0.6 | -0.2 | 0 | -0.6 | -0.1 | 0 | 0 | -0.8 |
| FLU OR*B*# | *PH* | 79-80 | 82-84 | 86-88 | 95-97 | 94-96 | 113-115 | 113-114 | 112-115 | 158-162 |
| *PY* | L>H | L>H | L>H | L>H | L>H | 113-115 | L>H | 112-115 | 160-162 |
| FLU % | *PH* | 67.2 | 63.1 | 62.7 | 59 | 62.3 | 69 | 69 | 60 | 66 |
| *PY* | 67.9 | 66.9 | 67 | 69.2 | 65.5 | 69.3 | 68.3 | 52.2 | 66.3 |
| ∆*PY*-*PH* | 0.7 | 3.8 | 4.3 | 10.3 | 3.2 | 0.3 | -0.7 | -8.2 | 0.8 |
| SS | *PH* | 146 | 48.6 | 47.9 | 48 | 47 | 86.8 | 129 | -26 | 0.2 |
| *PY* | 145.5 | 147 | 79.3 | 80.6 | 156 | 91.09 | 135 | -28 | 107 |
| ∆*PY*-*PH* | -0.13 | 98.9 | 31.36 | 32.4 | 109 | 4.25 | 5.44 | -1.9 | 106 |
|  |  |  |  |  |  |  |  |  |  |  |

### **Table ST9: comparison of Fluorescence profile of PH and PY BAPOs (1-9) in GP**

| GP |  | 1 | 2 | 3 | 4 | 5 | 6 | 7 | 8 | 9 |
| --- | --- | --- | --- | --- | --- | --- | --- | --- | --- | --- |
| FLU NM | *PH* | 382 | 383 | 382 | 383 | 381 | 457 | 393 | 351 | 459 |
| *PY* | 386.9 | 387 | 386.6 | 387 | 385 | 456.7 | 396 | 441 | 353 |
| ∆*PY*-*PH* | 4.57 | 4.03 | 4.12 | 3.9 | 4.39 | -0.2 | 3.83 | 90 | -106 |
| FLU OS | *PH* | 0.36 | 0.36 | 0.37 | 0.4 | 0.37 | 0.31 | 0.32 | 0.3 | 0.2 |
| *PY* | 0.34 | 0.34 | 0.35 | 0.3 | 0.34 | 0.304 | 0.34 | 0.18 | 0.29 |
| ∆*PY*-*PH* | 0 | 0 | 0 | 0 | 0 | 0 | 0.02 | -0.2 | 0 |
| FLU VIE | *PH* | 3.24 | 3.2 | 3.24 | 3.2 | 3.2 | 2.71 | 3.16 | 3.5 | 2.7 |
| *PY* | 3.2 | 3.21 | 3.2 | 3.2 | 3.22 | 2.715 | 3.13 | 2.81 | 3.51 |
| ∆*PY*-*PH* | 0 | 0 | 0 | 0 | 0 | 0 | 0 | -0.7 | 0.8 |
| FLU ORB # | *PH* | 78-80 | 82-84 | 86-88 | 95-97 | 94-96 | 113-115 | 112-114 | 112-115 | 160-162 |
| *PY* | 78-80 | 82-84 | 86-88 | 95-97 | 94-96 | 113-115 | 112-114 | 113-114 | 158-162 |
| FLU % | *PH* | 57 | 58 | 59 | 58 | 60 | 68 | 58 | 64 | 65 |
| *PY* | 55.4 | 55.3 | 55.7 | 55.5 | 56.6 | 67.1 | 52.4 | 52 | 57 |
| ∆*PY*-*PH* | -1.6 | -2.7 | -3.3 | -2.5 | -3.4 | -0.9 | -5.63 | -12 | -8 |
| SS | *PH* | 32.4 | 31 | 30.9 | 31 | 30.7 | 81.2 | 44.4 | -34 | 106 |
| *PY* | 36.6 | 35.3 | 35.2 | 35 | 34.9 | 78.01 | 36.3 | 83.2 | -0.2 |
| ∆*PY*-*PH* | 4.26 | 4.23 | 4.29 | 4.4 | 4.26 | -3.22 | -8.06 | 117 | -106 |

Gas-phase fluorescence and Stokes shifts. Data shows minimal intrinsic shifts for most derivatives, confirming large solvatochromic red-shifts are solvent-driven. Pronounced intrinsic shifts for **PY-8** (bathochromic) and **PY-9** (hypsochromic) highlight electronic effects modulated in solution.

### **Table ST 10: NBO (natural bond orbitals charges) of PY-BAPOS 1-9**

| PY | NBO Qe | |
| --- | --- | --- |
|  | SP | GP |
| 1 | 0.0017 | 0.056 |
| 2 | 0 | 0 |
| 3 | 0.019 | 0.0162 |
| 4 | 0.031 | 0.016 |
| 5 | 0.05516 | 0.06287 |
| 6 | 0.0292 | 0.13744 |
| 7 | 0.12547 | 0.02047 |
| 8 | 0 | 0.10485 |
| 9 | 0.26731 | 0.03774 |

### **Table ST 11: comparison of natural bond orbitals of PH and PY BAPOs (1-9) in SP**

| Qe | SP | 1 | 2 | 3 | 4 | 5 | 6 | 7 | 8 | 9 |
| --- | --- | --- | --- | --- | --- | --- | --- | --- | --- | --- |
| *PH* | 0.002 | 0.007 | 0.005 | 0.007 | 0.00507 | 0.07793 | 0.00507 | 0.00555 | 0.02301 |
| *PY* | 0.0017 | 0 | 0.019 | 0.031 | 0.05516 | 0.0292 | 0.12547 | 0 | 0.26731 |
| ∆*PY*-*PH* | -0.0003 | -0.007 | 0.014 | 0.024 | 0.05009 | -0.048 | 0.1204 | -0.005 | 0.2443 |

### **Table ST 12: H-3 to L+3 values in eV of PY-BAPOs 1-9 In SP and GP**

| SP | | H-3 | | H-2 | H-1 | | | H | | L | L+1 | | L+2 | | | L+3 | Eg | |
| --- | --- | --- | --- | --- | --- | --- | --- | --- | --- | --- | --- | --- | --- | --- | --- | --- | --- | --- |
| 1 | | -7.51 | | -7.39 | -7.2 | | | -6.59 | | -2.7 | -1.78 | | -1.35 | | | -1.12 | 3.88 | |
| 2 | | -7.55 | | -7.37 | -7.3 | | | -6.69 | | -2.8 | -1.81 | | -1.39 | | | -1.18 | 3.88 | |
| 3 | | -7.56 | | -7.3 | -7.3 | | | -6.7 | | -2.8 | -1.82 | | -1.4 | | | -1.19 | 3.88 | |
| 4 | | -7.55 | | -7.3 | -7.2 | | | -6.69 | | -2.8 | -1.82 | | -1.4 | | | -1.19 | 3.87 | |
| 5 | | -7.69 | | -7.57 | -7.3 | | | -6.77 | | -2.9 | -1.84 | | -1.43 | | | -1.29 | 3.9 | |
| 6 | | -7.24 | | -7.04 | -6.6 | | | -5.61 | | -2.8 | -2.04 | | -1.78 | | | -1.36 | 2.85 | |
| 7 | | -7.21 | | -7.02 | -6.6 | | | -6.42 | | -2.7 | -1.8 | | -1.66 | | | -1.34 | 3.73 | |
| 8 | | -7.21 | | -6.87 | -6.4 | | | -6.2 | | -2.5 | -2.36 | | -1.36 | | | -0.93 | 3.73 | |
| 9 | | -6.95 | | -6.83 | -6.6 | | | -6.21 | | -3 | -2.75 | | -2.16 | | | -1.82 | 3.22 | |
| **GP** | **H-3** | | **H-2** | | | **H-1** | **H** | | **L** | | | **L+1** | | **L+2** | **L+3** | | | **Eg** |
| 1 | -7.36 | | -7.26 | | | -6.95 | -6.44 | | -2.51 | | | -1.76 | | -1.32 | -1.04 | | | 3.93 |
| 2 | -7.45 | | -7.24 | | | -7.08 | -6.58 | | -2.67 | | | -1.83 | | -1.39 | -1.16 | | | 3.92 |
| 3 | -7.46 | | -7.16 | | | -7.09 | -6.6 | | -2.68 | | | -1.84 | | -1.39 | -1.17 | | | 3.91 |
| 4 | -7.46 | | -7.09 | | | -7.05 | -6.59 | | -2.69 | | | -1.83 | | -1.39 | -1.17 | | | 3.9 |
| 5 | -7.63 | | -7.51 | | | -7.17 | -6.73 | | -2.79 | | | -1.89 | | -1.45 | -1.26 | | | 3.94 |
| 6 | -7 | | -6.9 | | | -6.49 | -5.46 | | -2.58 | | | -1.92 | | -1.75 | -1.32 | | | 2.88 |
| 7 | -7 | | -6.93 | | | -6.48 | -6.28 | | -2.46 | | | -1.75 | | -1.61 | -1.29 | | | 3.83 |
| 8 | -7.4 | | -7.02 | | | -6.58 | -6.4 | | -2.77 | | | -2.56 | | -1.8 | -1.36 | | | 3.63 |
| 9 | -6.78 | | -6.59 | | | -6.53 | -6.07 | | -2.9 | | | -2.62 | | -2.29 | -1.85 | | | 3.18 |

### **Table ST13: comparison of energies (eV) for HOMO, LUMO & Energy gaps of PH and PY BAPOs (1-9) in SP**

| SP |  | F- | Cl- | *Br*- | CF3- | S- | SS- | SN- | NSN- |
| --- | --- | --- | --- | --- | --- | --- | --- | --- | --- |
|  | 1 | 2 | 3 | 4 | 5 | 6 | 7 | 8 | 9 |
| HOMO eV | -6.62 | -6.72 | -6.73 | -6.72 | -6.479 | -5.3 | -6.152 | -6.214 | -5.812 |
| -6.58 | -6.68 | -6.69 | -6.68 | -6.7749 | -5.6056 | -6.4198 | -6.1987 | -6.2079 |
| ∆*PY*-*PH* | 0.04 | 0.04 | 0.04 | 0.04 | -0.2959 | -0.3056 | -0.2678 | 0.0153 | -0.3959 |
| LUMO eV | -2.73 | -2.83 | -2.84 | -2.84 | -2.5118 | -2.419 | -2.354 | -2.474 | -2.6 |
| -2.7 | -2.8 | -2.81 | -2.82 | -2.8707 | -2.7566 | -2.6854 | -2.4663 | -2.9869 |
| ∆*PY*-*PH* | 0.03 | 0.03 | 0.03 | 0.02 | -0.3589 | -0.3376 | -0.3314 | 0.00767 | -0.3869 |
| Eg | 3.89 | 3.89 | 3.89 | 3.88 | 3.9672 | 2.881 | 3.798 | 3.74 | 3.212 |
| 3.88 | 3.88 | 3.88 | 3.86 | 3.90421 | 2.84903 | 3.73434 | 3.73238 | 3.22101 |
| ∆*PY*-*PH* | -0.01 | -0.01 | -0.01 | -0.02 | -0.063 | -0.032 | -0.0637 | -0.0076 | 0.00901 |

### **Table ST14: comparison of energies in eV (HOMO-1) and (LUMO+1) of PH and PY BAPOs (1-9) in SP**

| SP |  | 1 | 2 | 3 | 4 | 5 | 6 | 7 | 8 | 9 |
| --- | --- | --- | --- | --- | --- | --- | --- | --- | --- | --- |
| E H-1 | *PH* | -7.19 | -7.3 | -7.3 | -7.2 | -6.91 | -6.4 | -6.36 | -6.41 | -6.32 |
| *PY* | -7.21 | -7.3 | -7.3 | -7.19 | -7.32 | -6.6 | -6.63 | -6.39 | -6.6 |
| ∆*PY*-*PH* | -0.02 | -0 | -0 | 0.005 | -0.41 | -0.3 | -0.27 | 0.023 | -0.28 |
| E L+1 | *PH* | -1.42 | -1.5 | -1.5 | -1.46 | -1.05 | -1.7 | -1.34 | -2.39 | -2.41 |
| *PY* | -1.78 | -1.8 | -1.8 | -1.82 | -1.84 | -2 | -1.8 | -2.36 | -2.75 |
| ∆*PY*-*PH* | -0.36 | -0.3 | -0.3 | -0.35 | -0.79 | -0.3 | -0.46 | 0.031 | -0.33 |

### **Table ST 15: Fragment Contributions to HOMO and LUMO in Gas Phase for PY BAPOs (1-9)**

| HOMO LUMO FRAGMENTS %AGE CONTRIBUTIONS | | | | | | |
| --- | --- | --- | --- | --- | --- | --- |
| GP | HOMOs (gas) | | | LUMOs (gas) | | |
|  | APO | AR | PY | APO | AR | PY |
| 1 | 32.3 | 17.7 | 50 | 4.36 | 61.4 | 34.2 |
| 2 | 34.5 | 4.59 | 60.9 | 7.63 | 56.7 | 35.7 |
| 3 | 32 | 10.8 | 57.2 | 8.19 | 55.3 | 36.5 |
| 4 | 35.8 | 1.05 | 63.2 | 8.19 | 55.3 | 36.5 |
| 5 | 18.1 | 41.3 | 40.6 | 10.9 | 49.5 | 39.6 |
| 6 | 41.9 | 8.14 | 50 | 9.04 | 38.3 | 52.6 |
| 7 | 39.7 | 10.5 | 49.8 | 8.04 | 44.4 | 47.5 |
| 8 | 34.4 | 16.5 | 49.1 | 4.45 | 47 | 48.5 |
| 9 | 32.3 | 18.8 | 48.9 | 17.6 | 16.4 | 66 |

### **Table ST 16: Comparison of fragment Contributions % to HOMO and LUMO Levels of PH-BAPOs & PY-BAPOs in SP and GP**

| HOMO LUMO FRAGMENTS % CONTRIBUTIONS  COMPARISON IN PH/PY-BAPOs | | | | | | | | |
| --- | --- | --- | --- | --- | --- | --- | --- | --- |
|  | HOMO | HOMO | LUMO | LUMO | HOMO | HOMO | LUMO | LUMO |
|  | PH-SP | PY-SP | PH-SP | PY-SP | PH-GP | PY-GP | PH-GP | PY-GP |
| 1 | 36.8 | 59.7 | 46 | 32.77 | 36 | 50 | 45.1 | 34.2 |
| 2 | 26.9 | 74.9 | 46.3 | 34.73 | 23.3 | 60.9 | 47.5 | 35.7 |
| 3 | 24.5 | 69.6 | 47.8 | 35.36 | 12.6 | 57.2 | 47.9 | 36.5 |
| 4 | 22.6 | 73.9 | 48.4 | 35.42 | 10.6 | 63.2 | 48.7 | 36.5 |
| 5 | 23.4 | 53.1 | 48.5 | 50.02 | 11.4 | 40.6 | 48.7 | 39.6 |
| 6 | 21.6 | 52.1 | 72.3 | 49.77 | 16.9 | 50 | 56.6 | 52.6 |
| 7 | 47.3 | 52.7 | 72.7 | 45.44 | 46 | 49.8 | 73.4 | 47.5 |
| 8 | 46.1 | 53.7 | 66.9 | 45.05 | 45.3 | 49.1 | 66.89 | 48.5 |
| 9 | 42.8 | 60.5 | 66.9 | 85.84 | 40.6 | 48.9 | 64.6 | 66 |

### **Table ST 17: HOMO-LUMO Energy Offset (ΔE(H), ΔE(L)) for Donor-Acceptor Matching at GP for PY BAPOs (1-9)**

| MATCH BETWEEN DONOR/ACCEPTOR | | | | | | |
| --- | --- | --- | --- | --- | --- | --- |
|  | HOMO1-9 - HOMOE1-3 | | | LUMOHTMs - LUMO1-9 | | |
| PY  GP | E1 | E2 | E3 | H1 | H2 | H3 |
| 1 | 0.45 | 0.67 | 0.51 | 0.31 | 0.32 | 0.27 |
| 2 | 0.6 | 0.82 | 0.66 | 0.46 | 0.17 | 0.12 |
| 3 | 0.61 | 0.83 | 0.67 | 0.48 | 0.15 | 0.1 |
| 4 | 0.6 | 0.82 | 0.66 | 0.48 | 0.15 | 0.1 |
| 5 | 0.75 | 0.96 | 0.8 | 0.59 | 0.041 | 0.009 |
| 6 | 0.519 | 0.31 | 0.46 | 0.38 | 0.247 | 0.197 |
| 7 | 0.153 | 0.06 | 0.1 | 0.38 | 0.251 | 0.201 |
| 8 | 0.31 | 0.52 | 0.36 | 0.26 | 0.373 | 0.323 |
| 9 | 0.42 | 0.63 | 0.48 | 0.57 | 0.063 | 0.013 |

### **TABLE ST 18: Reactivity Descriptors and Transport Properties: IP, EA, λh, λe, GH, DM, β at GP for PY BAPOs (1-9)**

| REACTIVITY DESCRIPTORS GP | | | | | | | | |
| --- | --- | --- | --- | --- | --- | --- | --- | --- |
| PY GP | IP | EA | λh | Λe | λt | η | µ | β |
| 1 | 6.43 | 2.51 | 0.44 | 0.55 | 0.99 | 1.96 | 3.88 | 610 |
| 2 | 6.58 | 2.66 | 0.42 | 0.56 | 0.99 | 1.96 | 4.32 | 474 |
| 3 | 6.59 | 2.68 | 0.41 | 0.55 | 0.97 | 1.955 | 4.59 | 386 |
| 4 | 6.58 | 2.68 | 0.39 | 0.55 | 0.94 | 1.95 | 4.5 | 380 |
| 5 | 6.72 | 2.78 | 0.47 | 0.55 | 1.02 | 1.96 | 4.86 | 331 |
| 6 | 5.45 | 2.58 | 0.31 | 0.46 | 0.77 | 1.43 | 3.71 | 1029 |
| 7 | 5.82 | 2.57 | 0.23 | 0.53 | 0.77 | 1.62 | 3.84 | 1416 |
| 8 | 6.28 | 2.45 | 0.23 | 0.26 | 0.49 | 1.91 | 4.31 | 954 |
| 9 | 6.39 | 2.76 | 0.17 | 0.27 | 0.44 | 1.81 | 5.18 | 534 |

### **Table ST 19: comparison of Polarizability (α), hyperpolarizability (β) and dipole moment (µ) of PH and PY BAPOs (1-9) in SP & GP**

|  |  |  | 1 | 2 | 3 | 4 | 5 | 6 | 7 | 8 | 9 |
| --- | --- | --- | --- | --- | --- | --- | --- | --- | --- | --- | --- |
| α | SP | *PH* | 296.1 | 295 | 310 | 320 | 308 | 452 | 433.1 | 430 | 634 |
| *PY* | 291 | 290 | 305 | 315 | 303 | 446 | 428 | 425 | 629 |
| ∆*PY*-*PH* | -5.5 | -5.5 | -5.4 | -5 | -5.5 | -5.7 | -5.4 | -5.5 | -5 |
| GP | *PH* | 232.9 | 233 | 245 | 253 | 245 | 351 | 344.8 | 340 | 502 |
| *PY* | 229 | 229 | 241 | 249 | 241 | 348 | 341 | 337 | 498 |
| ∆*PY*-*PH* | -3.8 | -3.7 | -3.7 | -4 | -3.7 | -3.8 | -3.9 | -2.6 | -3.8 |
| β | SP | *PH* | 1025 | 584 | 372 | 366 | 338 | 2147 | 1717 | 826 | 1145 |
| *PY* | 1049 | 678 | 486 | 481 | 643 | 1872 | 1685 | 756 | 1094 |
| ∆*PY*-*PH* | 24.4 | 93.5 | 114 | 115 | 305 | -275 | -32 | -70 | -51 |
| GP | *PH* | 624 | 488 | 424 | 424 | 220 | 1283 | 1074 | 672 | 646 |
| *PY* | 610 | 475 | 387 | 380 | 332 | 1030 | 955 | 534 | 564 |
| ∆*PY*-*PH* | -14 | -13 | -37 | -44 | 112 | -253 | -119 | -138 | -82 |
| µ | SP | *PH* | 4.617 | 5.65 | 6.16 | 6.02 | 6.59 | 4.38 | 5.62 | 6.4 | 13.1 |
| *PY* | 4.9 | 5.31 | 5.63 | 5.5 | 5.87 | 4.8 | 5.42 | 6.55 | 12.2 |
| ∆*PY*-*PH* | 0.28 | -0.3 | -0.5 | -0 | -0.7 | 0.42 | -0.2 | 0.15 | -0.8 |
| GP | *PH* | 4.62 | 5.65 | 6.16 | 6 | 6.59 | 4.38 | 5.62 | 6.4 | 13.1 |
| *PY* | 3.88 | 4.32 | 4.59 | 4.5 | 4.86 | 3.71 | 4.31 | 5.19 | 9.24 |
| ∆*PY*-*PH* | -0.74 | -1.3 | -1.5 | -1.5 | -1.7 | -0.66 | -1.31 | -1.2 | -3.8 |

### **Table ST 20: comparison of reorganization energy of electron (λe), reorganization energy of hole (λh), Global Hardness (H), Globel electrophilicity index (ω) of PH and PY BAPOs (1-9) in SP**

| SP |  | 1 | 2 | 3 | 4 | 5 | 6 | 7 | 8 | 9 |
| --- | --- | --- | --- | --- | --- | --- | --- | --- | --- | --- |
| λe | *PH* | 0.514995 | 0.526968 | 0.512274 | 0.507839 | 0.505199 | 0.477499 | 0.509553 | 0.424791 | 0.359729 |
| *PY* | 0.526832 | 0.538315 | 0.53271 | 0.527295 | 0.52539 | 0.489988 | 0.523757 | 0.429961 | 0.362886 |
| ∆*PY*-*PH* | 0.011837 | 0.011347 | 0.020435 | 0.019456 | 0.020191 | 0.01249 | 0.014204 | 0.00517 | 0.003156 |
| λh | *PH* | 0.38065 | 0.36868 | 0.37393 | 0.35856 | 0.40887 | 0.2246 | 0.22482 | 0.22019 | 0.22939 |
| *PY* | 0.39538 | 0.38471 | 0.38825 | 0.37374 | 0.4234 | 0.22343 | 0.20806 | 0.20093 | 0.22974 |
| ∆*PY*-*PH* | 0.01472 | 0.01603 | 0.01431 | 0.01518 | 0.01453 | -0.0012 | -0.0168 | -0.0193 | 0.00035 |
| λt | *PH* | 0.89565 | 0.89565 | 0.88621 | 0.8664 | 0.91407 | 0.7021 | 0.73437 | 0.64498 | 0.58912 |
| *PY* | 0.92221 | 0.92302 | 0.92096 | 0.90104 | 0.94879 | 0.71342 | 0.73181 | 0.63089 | 0.59263 |
| ∆*PY*-*PH* | 0.02656 | 0.02737 | 0.03475 | 0.03464 | 0.03472 | 0.01132 | -0.0026 | -0.0141 | 0.00351 |
| H | *PH* | 1.945 | 1.945 | 1.945 | 1.94 | 1.9836 | 1.4405 | 1.899 | 1.87 | 1.606 |
| *PY* | 1.94 | 1.94 | 1.94 | 1.93 | 1.95211 | 1.42451 | 1.86717 | 1.86619 | 1.6105 |
| ∆*PY*-*PH* | -0.005 | -0.005 | -0.005 | -0.01 | -0.0315 | -0.016 | -0.0318 | -0.0038 | 0.0045 |
| ω | *PH* | 21.25 | 22.2 | 22.3 | 22.16 | 20.04 | 10.7 | 17.17 | 17.64 | 14.21 |
| *PY* | 20.88 | 21.8 | 21.9 | 21.77 | 22.7 | 12.5 | 19.35 | 17.51 | 17.02 |
| ∆*PY*-*PH* | -0.37 | -0.4 | -0.4 | -0.39 | 2.66 | 1.72 | 2.175 | -0.13 | 2.814 |

### **Table ST21: comparison of reorganization energy of electron (λe), reorganization energy of hole (λh) and Global Hardness (H) of PH and PY BAPOs (1-9) in GP**

| GP |  | 1 | 2 | 3 | 4 | 5 | 6 | 7 | 8 | 9 |
| --- | --- | --- | --- | --- | --- | --- | --- | --- | --- | --- |
| λe | *PH* | 0.526751 | 0.542832 | 0.535512 | 0.532274 | 0.534288 | 0.453961 | 0.518097 | 0.269552 | 0.259321 |
| *PY* | 0.551104 | 0.565445 | 0.558234 | 0.554805 | 0.556846 | 0.465036 | 0.536601 | 0.265634 | 0.270613 |
| ∆*PY*-*PH* | 0.024354 | 0.022612 | 0.022721 | 0.022531 | 0.022558 | 0.011075 | 0.018503 | -0.00392 | 0.011293 |
| λh | *PH* | 0.41029 | 0.39083 | 0.37984 | 0.35339 | 0.43519 | 0.29573 | 0.22177 | 0.21676 | 0.17937 |
| *PY* | 0.44174 | 0.42656 | 0.41676 | 0.39138 | 0.47236 | 0.31018 | 0.23831 | 0.23249 | 0.17459 |
| ∆*PY*-*PH* | 0.03146 | 0.03573 | 0.03693 | 0.03799 | 0.03717 | 0.01445 | 0.01654 | 0.01573 | -0.0048 |
| λt | *PH* | 0.93704 | 0.93366 | 0.91535 | 0.88566 | 0.96947 | 0.74969 | 0.73987 | 0.48631 | 0.4387 |
| *PY* | 0.99285 | 0.992 | 0.975 | 0.94618 | 1.0292 | 0.77521 | 0.77491 | 0.49812 | 0.4452 |
| ∆*PY*-*PH* | 0.05581 | 0.05834 | 0.05965 | 0.06052 | 0.05973 | 0.02552 | 0.03505 | 0.01181 | 0.0065 |
| H | *PH* | 1.965 | 1.96 | 1.955 | 1.95 | 2 | 1.42765 | 1.933 | 1.847 | 1.5885 |
| *PY* | 1.96 | 1.96 | 1.955 | 1.95 | 1.96791 | 1.43784 | 1.91382 | 1.81601 | 1.58936 |
| ∆*PY*-*PH* | -0.005 | 0 | 0 | 0 | -0.0321 | 0.01019 | -0.0192 | -0.031 | 0.00086 |

### **Table ST22: comparison of Hole and Electron transfer (integrals and potentials) of PH and PY BAPOs (1-9) in SP**

###

| RE*A*CTIVITY DESCRIPTORS | SP |  | 1 | 2 | 3 | 4 | 5 | 6 | 7 | 8 | 9 |
| --- | --- | --- | --- | --- | --- | --- | --- | --- | --- | --- | --- |
| HTI | *PH* | 0.283 | 0.27 | 0.26 | 0.239 | 0.217 | 0.53 | 0.103 | 0.098 | 0.256 |
| *PY* | 0.315 | 0.3 | 0.3 | 0.256 | 0.275 | 0.52 | 0.104 | 0.094 | 0.198 |
| ∆*PY*-*PH* | 0.032 | 0.04 | 0.03 | 0.017 | 0.057 | -0 | 0 | -0 | -0.06 |
| ETI | *PH* | 0.654 | 0.69 | 0.69 | 0.688 | 0.731 | 0.36 | 0.509 | 0.041 | 0.096 |
| *PY* | 0.458 | 0.49 | 0.5 | 0.5 | 0.513 | 0.36 | 0.445 | 0.053 | 0.121 |
| ∆*PY*-*PH* | -0.2 | -0.2 | -0.2 | -0.19 | -0.22 | -0 | -0.06 | 0.012 | 0.025 |
| HEP | *PH* | 0.224 | 0.23 | 0.23 | 0.229 | 0.23 | 0.19 | 0.222 | 0.225 | 0.211 |
| *PY* | 0.222 | 0.23 | 0.23 | 0.227 | 0.228 | 0.19 | 0.222 | 0.225 | 0.211 |
| ∆*PY*-*PH* | -0 | -0 | -0 | -0 | -0 | 0 | 0 | 0 | -0 |
| EEP | *PH* | 0.1 | 0.1 | 0.1 | 0.104 | 0.105 | 0.1 | 0.1 | 0.101 | 0.104 |
| *PY* | 0.099 | 0.1 | 0.1 | 0.104 | 0.104 | 0.1 | 0.099 | 0.101 | 0.104 |
| ∆*PY*-*PH* | 0 | -0 | -0 | 0 | 0 | -0 | 0 | 0 | 0 |

**SUPPLEMENTARY/SUPPORTING FIGURES:**

### **Figure SF 1: ChemDraw Illustration of Key Bond Lengths and Bond Angles across PY-BAPO Derivatives (1-9)**

### **Figure SF 2: Identification of Fragments (APO, PY, AR) For 1-9**


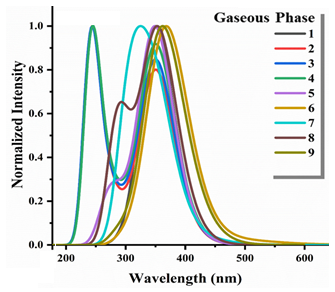


### **Figure SF 3: Absorption Spectra of Selected Molecules (1-9) in GP**


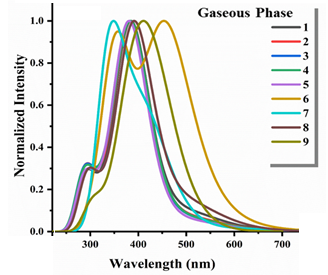


### **Figure SF 4: Emission Spectra of Selected Molecules (1-9) in GP**


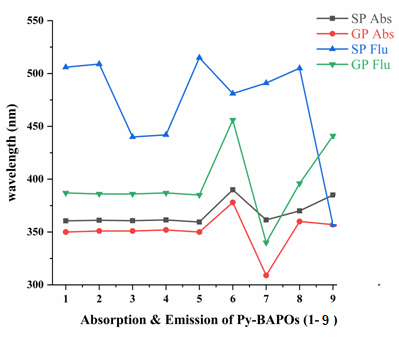


### **Figure SF 5: Absorption & Emission Maxima of Selected Molecules (1-9) in SP/GP of PY-BAPOs .**


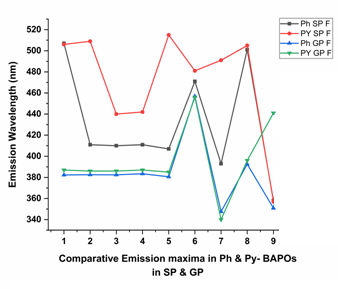


### **Figure SF 6: Comparison of Emission Maxima of Selected Molecules (1-9) in SP/GP of PH/PY-BAPOs .**


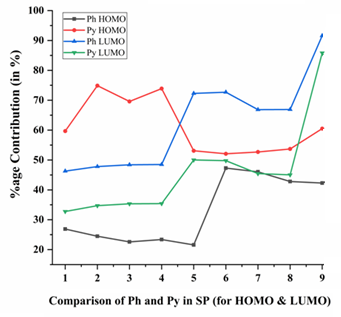


### **Figure SF 7: Comparison of PH/PY-BAPOs for HOMO LUMO %age fragment contribution.**


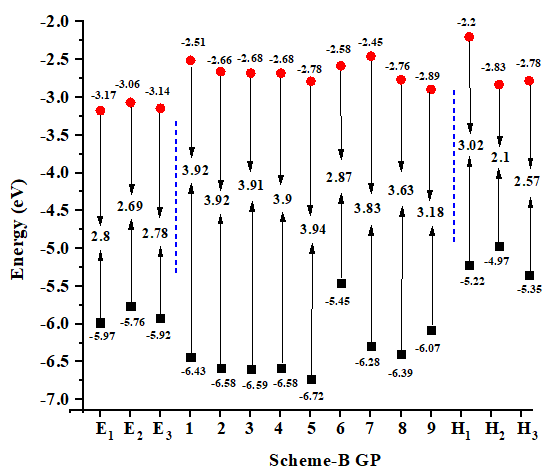


### **Figure SF 8: FMO Offset comparison with E1-3 & H1-3 PY-BAPO derivatives (1-9)**


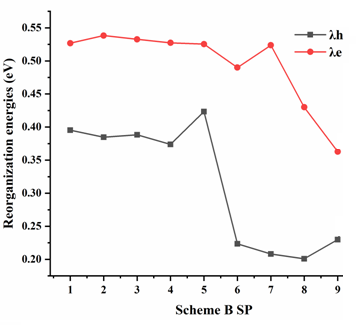


### **Figure SF 9: Reorganization energies for holes & electrons of molecules (1-9) in SP of PY-BAPOs.**


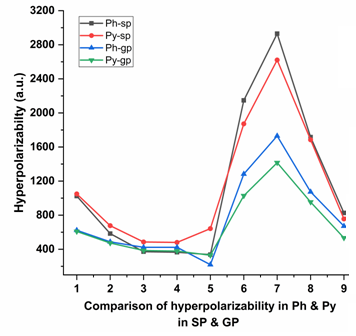


### **Figure SF 10: Comparison of PH/PY-BAPOs for hyperpolarizability in SP/GP.**

**ANNEXED: MULTIPLICITIES OF DESIGNED MOLECULES AT OPTIMIZED COORDINATES**

| **Codes** | **Charge** | **Multiplicities** |  |
| --- | --- | --- | --- |
| **PY-1** |  |  |  |
|  | Charge 0 | Multiplicity 1 |  |
| C | -1.70371 | -2.28567 | 0.79632 |
| C | -0.34779 | -1.95878 | 0.76333 |
| C | 0.04617 | -0.63626 | 0.56092 |
| C | -0.91598 | 0.3599 | 0.3902 |
| C | -2.27155 | 0.03293 | 0.42272 |
| C | -2.66548 | -1.28988 | 0.62619 |
| H | -2.01411 | -3.32835 | 0.95635 |
| H | -0.60512 | 1.40257 | 0.23057 |
| H | -3.03008 | 0.8178 | 0.2882 |
| H | -3.7342 | -1.54737 | 0.65198 |
| P | 1.81501 | -0.20976 | 0.51946 |
| C | 3.90386 | -1.71931 | 0.6626 |
| C | 4.59008 | -2.87935 | 1.02172 |
| C | 4.60791 | -0.54025 | 0.41654 |
| C | 5.98049 | -2.86047 | 1.13516 |
| H | 4.03526 | -3.80877 | 1.21535 |
| C | 5.99795 | -0.52118 | 0.53039 |
| H | 4.06662 | 0.37413 | 0.13301 |
| C | 6.68439 | -1.6816 | 0.89016 |
| H | 6.52113 | -3.77499 | 1.41905 |
| H | 6.55317 | 0.40818 | 0.33721 |
| H | 7.78028 | -1.66648 | 0.98016 |
| C | 2.80801 | -1.73406 | 0.57298 |
| N | 1.33283 | -2.50799 | 0.80595 |
| O | 2.04692 | 0.9428 | -0.72228 |
| C | 1.28463 | 1.08786 | 1.47212 |
| C | 1.08488 | 2.34169 | 0.89384 |
| C | 0.612 | 1.97076 | 3.61828 |
| C | 0.64816 | 3.40969 | 1.67754 |
| H | 1.27163 | 2.48769 | -0.18007 |
| C | 0.41132 | 3.22403 | 3.04013 |
| H | 0.42509 | 1.82406 | 4.69196 |
| H | 0.48992 | 4.39795 | 1.22192 |
| H | 0.06677 | 4.06599 | 3.65793 |
| N | 1.04837 | 0.90243 | 2.83424 |
|  |  |  |  |
| **PY-2** |  |  |  |
|  | Charge 0 | Multiplicity 1 |  |
| C | -1.70371 | -2.28567 | 0.79632 |
| C | -0.34779 | -1.95878 | 0.76333 |
| C | 0.04617 | -0.63626 | 0.56092 |
| C | -0.91598 | 0.3599 | 0.3902 |
| C | -2.27155 | 0.03293 | 0.42272 |
| C | -2.66548 | -1.28988 | 0.62619 |
| H | -2.01411 | -3.32835 | 0.95635 |
| H | -0.60512 | 1.40257 | 0.23057 |
| H | -3.03008 | 0.8178 | 0.2882 |
| H | -3.7342 | -1.54737 | 0.65198 |
| P | 1.81501 | -0.20976 | 0.51946 |
| C | 3.90386 | -1.71931 | 0.6626 |
| C | 4.59008 | -2.87935 | 1.02172 |
| C | 4.60791 | -0.54025 | 0.41654 |
| C | 5.98049 | -2.86047 | 1.13516 |
| H | 4.03526 | -3.80877 | 1.21535 |
| C | 5.99795 | -0.52118 | 0.53039 |
| H | 4.06662 | 0.37413 | 0.13301 |
| C | 6.68439 | -1.6816 | 0.89016 |
| H | 6.52113 | -3.77499 | 1.41905 |
| H | 7.78028 | -1.66648 | 0.98016 |
| C | 2.80801 | -1.73406 | 0.57298 |
| N | 1.33283 | -2.50799 | 0.80595 |
| O | 2.04692 | 0.9428 | -0.72228 |
| C | 1.28463 | 1.08786 | 1.47212 |
| C | 1.08488 | 2.34169 | 0.89384 |
| C | 0.612 | 1.97076 | 3.61828 |
| C | 0.64816 | 3.40969 | 1.67754 |
| H | 1.27163 | 2.48769 | -0.18007 |
| C | 0.41132 | 3.22403 | 3.04013 |
| H | 0.42509 | 1.82406 | 4.69196 |
| H | 0.48992 | 4.39795 | 1.22192 |
| H | 0.06677 | 4.06599 | 3.65793 |
| N | 1.04837 | 0.90243 | 2.83424 |
| F | 6.67955 | 0.61973 | 0.29324 |
|  |  |  |  |
| **PY-3** |  |  |  |
|  | Charge 0 | Multiplicity 1 |  |
| C | -1.70371 | -2.28567 | 0.79632 |
| C | -0.34779 | -1.95878 | 0.76333 |
| C | 0.04617 | -0.63626 | 0.56092 |
| C | -0.91598 | 0.3599 | 0.3902 |
| C | -2.27155 | 0.03293 | 0.42272 |
| C | -2.66548 | -1.28988 | 0.62619 |
| H | -2.01411 | -3.32835 | 0.95635 |
| H | -0.60512 | 1.40257 | 0.23057 |
| H | -3.03008 | 0.8178 | 0.2882 |
| H | -3.7342 | -1.54737 | 0.65198 |
| P | 1.81501 | -0.20976 | 0.51946 |
| C | 3.90386 | -1.71931 | 0.6626 |
| C | 4.59008 | -2.87935 | 1.02172 |
| C | 4.60791 | -0.54025 | 0.41654 |
| C | 5.98049 | -2.86047 | 1.13516 |
| H | 4.03526 | -3.80877 | 1.21535 |
| C | 5.99795 | -0.52118 | 0.53039 |
| H | 4.06662 | 0.37413 | 0.13301 |
| C | 6.68439 | -1.6816 | 0.89016 |
| H | 6.52113 | -3.77499 | 1.41905 |
| H | 7.78028 | -1.66648 | 0.98016 |
| C | 2.80801 | -1.73406 | 0.57298 |
| N | 1.33283 | -2.50799 | 0.80595 |
| O | 2.04692 | 0.9428 | -0.72228 |
| C | 1.28463 | 1.08786 | 1.47212 |
| C | 1.08488 | 2.34169 | 0.89384 |
| C | 0.612 | 1.97076 | 3.61828 |
| C | 0.64816 | 3.40969 | 1.67754 |
| H | 1.27163 | 2.48769 | -0.18007 |
| C | 0.41132 | 3.22403 | 3.04013 |
| H | 0.42509 | 1.82406 | 4.69196 |
| H | 0.48992 | 4.39795 | 1.22192 |
| H | 0.06677 | 4.06599 | 3.65793 |
| N | 1.04837 | 0.90243 | 2.83424 |
| Cl | 6.88656 | 0.96623 | 0.22122 |
|  |  |  |  |
| **PY-4** |  |  |  |
|  | Charge 0 | Multiplicity 1 |  |
| C | -1.70371 | -2.28567 | 0.79632 |
| C | -0.34779 | -1.95878 | 0.76333 |
| C | 0.04617 | -0.63626 | 0.56092 |
| C | -0.91598 | 0.3599 | 0.3902 |
| C | -2.27155 | 0.03293 | 0.42272 |
| C | -2.66548 | -1.28988 | 0.62619 |
| H | -2.01411 | -3.32835 | 0.95635 |
| H | -0.60512 | 1.40257 | 0.23057 |
| H | -3.03008 | 0.8178 | 0.2882 |
| H | -3.7342 | -1.54737 | 0.65198 |
| P | 1.81501 | -0.20976 | 0.51946 |
| C | 3.90386 | -1.71931 | 0.6626 |
| C | 4.59008 | -2.87935 | 1.02172 |
| C | 4.60791 | -0.54025 | 0.41654 |
| C | 5.98049 | -2.86047 | 1.13516 |
| H | 4.03526 | -3.80877 | 1.21535 |
| C | 5.99795 | -0.52118 | 0.53039 |
| H | 4.06662 | 0.37413 | 0.13301 |
| C | 6.68439 | -1.6816 | 0.89016 |
| H | 6.52113 | -3.77499 | 1.41905 |
| H | 7.78028 | -1.66648 | 0.98016 |
| C | 2.80801 | -1.73406 | 0.57298 |
| N | 1.33283 | -2.50799 | 0.80595 |
| O | 2.04692 | 0.9428 | -0.72228 |
| C | 1.28463 | 1.08786 | 1.47212 |
| C | 1.08488 | 2.34169 | 0.89384 |
| C | 0.612 | 1.97076 | 3.61828 |
| C | 0.64816 | 3.40969 | 1.67754 |
| H | 1.27163 | 2.48769 | -0.18007 |
| C | 0.41132 | 3.22403 | 3.04013 |
| H | 0.42509 | 1.82406 | 4.69196 |
| H | 0.48992 | 4.39795 | 1.22192 |
| H | 0.06677 | 4.06599 | 3.65793 |
| N | 1.04837 | 0.90243 | 2.83424 |
| Br | 6.96229 | 1.093 | 0.19487 |
|  |  |  |  |
| **PY-5** |  |  |  |
|  | Charge 0 | Multiplicity 1 |  |
| C | -3.89828 | -2.34839 | 0.49456 |
| C | -2.76649 | -1.61448 | 0.14772 |
| C | -2.87664 | -0.48341 | -0.68612 |
| C | -4.11312 | -0.08378 | -1.17935 |
| C | -5.2518 | -0.82582 | -0.83573 |
| C | -5.14117 | -1.94429 | -0.00591 |
| H | -3.80202 | -3.21533 | 1.13982 |
| H | -4.20137 | 0.78645 | -1.82279 |
| H | -6.22337 | -0.52878 | -1.21729 |
| H | -6.0306 | -2.50978 | 0.25424 |
| P | -1.21495 | 0.2033 | -0.91554 |
| C | 0.87489 | -1.36466 | 0.49445 |
| C | 1.26028 | -2.25441 | 1.51439 |
| C | 1.86389 | -0.65919 | -0.20934 |
| C | 2.6042 | -2.42829 | 1.82548 |
| H | 0.49102 | -2.79824 | 2.05112 |
| C | 3.20931 | -0.84182 | 0.10823 |
| H | 1.58746 | 0.00229 | -1.02288 |
| C | 3.5854 | -1.7224 | 1.12601 |
| H | 2.89373 | -3.11535 | 2.61383 |
| H | 4.63457 | -1.8605 | 1.36346 |
| C | -0.54256 | -1.18538 | 0.16074 |
| N | -1.46767 | -1.9713 | 0.60312 |
| O | -0.64559 | 0.3418 | -2.30476 |
| C | -1.08796 | 1.73373 | 0.06437 |
| C | -0.39682 | 2.81617 | -0.49561 |
| C | -1.50831 | 3.0366 | 2.06138 |
| C | -0.26597 | 4.00585 | 0.22282 |
| H | 0.02711 | 2.72101 | -1.48999 |
| C | -0.81915 | 4.11552 | 1.49958 |
| H | -1.9405 | 3.12281 | 3.05349 |
| H | 0.26706 | 4.84413 | -0.21507 |
| H | -0.7157 | 5.04103 | 2.05793 |
| C | 4.2647 | -0.04761 | -0.61235 |
| F | 5.40476 | -0.75727 | -0.77507 |
| F | 4.60178 | 1.07342 | 0.07203 |
| F | 3.85694 | 0.35035 | -1.83691 |
| N | -1.64558 | 1.84776 | 1.34724 |
|  |  |  |  |
| **PY-6** |  |  |  |
|  | Charge 0 | Multiplicity 1 |  |
| C | -2.81742 | -0.59163 | -1.77407 |
| C | -3.57669 | -0.0749 | -0.67371 |
| C | -3.3411 | -1.59413 | -2.54755 |
| C | -4.90433 | -0.6167 | -0.43129 |
| C | -4.63901 | -2.14116 | -2.28903 |
| H | -2.76365 | -1.98249 | -3.38109 |
| C | -5.40902 | -1.66656 | -1.26293 |
| H | -5.01258 | -2.93704 | -2.92637 |
| H | -6.39894 | -2.06937 | -1.07015 |
| S | -4.55901 | 1.21518 | 1.33283 |
| C | -3.24396 | 0.9477 | 0.22505 |
| C | -5.54391 | 0.00059 | 0.6318 |
| H | -6.5277 | -0.20407 | 1.03002 |
| H | -1.83493 | -0.19291 | -1.9997 |
| C | -2.01695 | 1.74548 | 0.33659 |
| C | -2.05848 | 3.10519 | 0.6993 |
| C | -0.75935 | 1.16642 | 0.09501 |
| C | -0.88564 | 3.85385 | 0.81161 |
| H | -3.0174 | 3.58318 | 0.87476 |
| C | 0.42122 | 1.91911 | 0.17973 |
| H | -0.70644 | 0.11291 | -0.14879 |
| C | 0.35041 | 3.27661 | 0.54587 |
| H | -0.94473 | 4.90105 | 1.09178 |
| H | 1.26523 | 3.85423 | 0.61096 |
| C | 1.71379 | 1.2973 | -0.12241 |
| C | 3.94997 | 1.15598 | -0.45971 |
| C | 3.70937 | -0.18514 | -0.82108 |
| N | 2.83139 | 1.9462 | -0.08195 |
| P | 1.92907 | -0.48938 | -0.675 |
| O | 1.14385 | -0.92753 | -1.8862 |
| C | 1.65289 | -1.55549 | 0.77654 |
| C | 0.69522 | -2.573 | 0.67181 |
| C | 0.44568 | -3.4098 | 1.76101 |
| H | 0.15602 | -2.70341 | -0.26102 |
| C | 2.1031 | -2.21673 | 3.06185 |
| C | 1.14719 | -3.23131 | 2.95436 |
| H | -0.29511 | -4.19885 | 1.67596 |
| H | 2.65005 | -2.07933 | 3.98951 |
| H | 0.95158 | -3.88213 | 3.80125 |
| C | 4.7556 | -1.01474 | -1.20765 |
| C | 5.24453 | 1.67028 | -0.48329 |
| C | 6.05729 | -0.49573 | -1.23743 |
| C | 6.29451 | 0.83317 | -0.87683 |
| H | 5.41927 | 2.70299 | -0.20004 |
| H | 7.30722 | 1.2236 | -0.90246 |
| H | 6.88347 | -1.12987 | -1.54255 |
| H | 4.57297 | -2.04842 | -1.48573 |
| N | 2.35918 | -1.38066 | 1.97661 |
|  |  |  |  |
| **PY-7** |  |  |  |
|  | Charge 0 | Multiplicity 1 |  |
| C | 3.17165 | -0.11538 | -0.91726 |
| C | 4.50577 | 0.37314 | -0.92402 |
| S | 4.39133 | -1.19164 | 1.13021 |
| C | 2.94181 | -0.97866 | 0.12991 |
| C | 5.30217 | -0.11054 | 0.10929 |
| C | 1.69414 | -1.67606 | 0.46393 |
| C | 1.68992 | -2.88132 | 1.18808 |
| C | 0.46024 | -1.14467 | 0.051 |
| C | 0.49193 | -3.53649 | 1.47991 |
| H | 2.62918 | -3.32115 | 1.50945 |
| C | -0.74466 | -1.80431 | 0.33071 |
| H | 0.44072 | -0.21225 | -0.50231 |
| C | -0.72213 | -3.01362 | 1.05179 |
| H | 0.51396 | -4.46653 | 2.03937 |
| H | -1.65756 | -3.51647 | 1.26881 |
| C | -2.01741 | -1.23496 | -0.124 |
| C | -4.23199 | -1.14802 | -0.59604 |
| C | -3.98601 | 0.17094 | -1.02795 |
| N | -3.12928 | -1.89358 | -0.09693 |
| P | -2.22398 | 0.51645 | -0.78195 |
| O | -1.37185 | 0.92821 | -1.95642 |
| C | -2.05733 | 1.63719 | 0.6453 |
| C | -1.11421 | 2.66982 | 0.56225 |
| C | -0.94643 | 3.5484 | 1.63397 |
| H | -0.52394 | 2.78035 | -0.34158 |
| C | -2.65556 | 2.36533 | 2.87566 |
| C | -1.71451 | 3.39568 | 2.78932 |
| H | -0.21705 | 4.34961 | 1.56526 |
| H | -3.25433 | 2.2478 | 3.77355 |
| H | -1.58235 | 4.07885 | 3.6229 |
| C | -5.01459 | 0.9537 | -1.53939 |
| C | -5.51455 | -1.68641 | -0.67141 |
| C | -6.30395 | 0.40999 | -1.62139 |
| C | -6.54699 | -0.89618 | -1.18897 |
| H | -5.69361 | -2.70154 | -0.33278 |
| H | -7.55019 | -1.30578 | -1.25584 |
| H | -7.11614 | 1.00745 | -2.02284 |
| H | -4.8276 | 1.96974 | -1.87392 |
| C | 6.64219 | 0.37521 | 0.09555 |
| C | 6.84616 | 1.22528 | -0.95582 |
| S | 5.4202 | 1.45249 | -1.94852 |
| H | 2.42256 | 0.13169 | -1.65933 |
| H | 7.75739 | 1.74442 | -1.21889 |
| H | 7.40825 | 0.11447 | 0.81516 |
| N | -2.83002 | 1.48767 | 1.8072 |
|  |  |  |  |
| **PY-8** |  |  |  |
|  | Charge 0 | Multiplicity 1 |  |
| C | 3.01819 | 3.56277 | 0.24187 |
| C | 2.75702 | 2.2528 | -0.15426 |
| C | 3.80522 | 1.41937 | -0.59385 |
| C | 5.1125 | 1.88926 | -0.64476 |
| C | 5.37458 | 3.20891 | -0.25178 |
| C | 4.33512 | 4.03273 | 0.18778 |
| H | 2.20472 | 4.19543 | 0.5815 |
| H | 5.92127 | 1.24932 | -0.98484 |
| H | 6.38958 | 3.59119 | -0.28988 |
| H | 4.55034 | 5.05287 | 0.49069 |
| P | 3.09096 | -0.18829 | -1.02872 |
| C | 0.15129 | -0.28212 | -0.64537 |
| C | -1.02622 | 0.21848 | -0.06193 |
| C | 0.11526 | -1.51752 | -1.31391 |
| C | -2.22895 | -0.49206 | -0.12678 |
| H | -0.98569 | 1.18341 | 0.43081 |
| C | -1.08045 | -2.22934 | -1.38885 |
| H | 1.00818 | -1.90256 | -1.79539 |
| C | -2.24054 | -1.72845 | -0.80269 |
| H | -1.10835 | -3.18288 | -1.90676 |
| H | -3.16311 | -2.2924 | -0.86416 |
| C | 1.3959 | 0.4874 | -0.56568 |
| N | 1.44453 | 1.7082 | -0.14167 |
| O | 3.27771 | -0.73228 | -2.42271 |
| C | 3.55003 | -1.38484 | 0.26743 |
| C | 3.91865 | -2.6758 | -0.13259 |
| C | 3.88518 | -2.00891 | 2.5829 |
| C | 4.27196 | -3.62822 | 0.82492 |
| H | 3.93121 | -2.92171 | -1.18952 |
| C | 4.25384 | -3.29608 | 2.18048 |
| H | 3.87315 | -1.74999 | 3.63714 |
| H | 4.56072 | -4.62678 | 0.51145 |
| H | 4.52781 | -4.03788 | 2.92464 |
| C | -3.44495 | 0.04611 | 0.53749 |
| C | -4.73193 | -0.02891 | -0.05118 |
| C | -3.35456 | 0.66487 | 1.78908 |
| C | -5.85362 | 0.50919 | 0.62839 |
| C | -4.47524 | 1.19189 | 2.44743 |
| H | -2.38671 | 0.71859 | 2.27672 |
| C | -5.74219 | 1.12154 | 1.87851 |
| H | -4.3505 | 1.65463 | 3.42135 |
| H | -6.60939 | 1.52649 | 2.38857 |
| N | -5.01483 | -0.58287 | -1.29491 |
| S | -7.29017 | 0.28318 | -0.3515 |
| C | -6.27557 | -0.49217 | -1.56516 |
| H | -6.72602 | -0.85733 | -2.48108 |
| N | 3.53527 | -1.05305 | 1.63086 |
|  |  |  |  |
| **PY-9** |  |  |  |
|  | Charge 0 | Multiplicity 1 |  |
| C | 3.0699 | 3.5443 | 0.18025 |
| C | 2.7838 | 2.23352 | -0.19497 |
| C | 3.8152 | 1.37354 | -0.623 |
| C | 5.13104 | 1.81784 | -0.68263 |
| C | 5.41835 | 3.13838 | -0.3107 |
| C | 4.39538 | 3.98851 | 0.11711 |
| H | 2.26901 | 4.19741 | 0.51091 |
| H | 5.92725 | 1.15768 | -1.01352 |
| H | 6.44028 | 3.50086 | -0.35609 |
| H | 4.63026 | 5.00903 | 0.4036 |
| P | 3.07013 | -0.2272 | -1.0312 |
| C | 0.12921 | -0.25794 | -0.64459 |
| C | -1.03065 | 0.26327 | -0.04616 |
| C | 0.06156 | -1.49008 | -1.31696 |
| C | -2.24728 | -0.42565 | -0.09677 |
| H | -0.96625 | 1.22725 | 0.44576 |
| C | -1.1487 | -2.17775 | -1.38173 |
| H | 0.94143 | -1.88926 | -1.81085 |
| C | -2.29221 | -1.6576 | -0.78003 |
| H | -1.2015 | -3.12763 | -1.90424 |
| H | -3.22473 | -2.20601 | -0.83253 |
| C | 1.38924 | 0.48856 | -0.57842 |
| N | 1.46099 | 1.71406 | -0.17261 |
| O | 3.24218 | -0.79828 | -2.41619 |
| C | 3.5056 | -1.41102 | 0.28443 |
| C | 3.82435 | -2.72213 | -0.0924 |
| C | 3.84803 | -1.99794 | 2.60857 |
| C | 4.15664 | -3.66601 | 0.88093 |
| H | 3.81584 | -2.99042 | -1.1439 |
| C | 4.16698 | -3.30523 | 2.22925 |
| H | 3.85857 | -1.71672 | 3.65709 |
| H | 4.40702 | -4.68026 | 0.5854 |
| H | 4.42481 | -4.04036 | 2.98567 |
| C | -3.44165 | 0.13008 | 0.58635 |
| C | -4.7656 | 0.03752 | 0.02685 |
| C | -3.34082 | 0.77971 | 1.80066 |
| C | -5.90446 | 0.60952 | 0.72708 |
| C | -4.46166 | 1.3404 | 2.48506 |
| H | -2.36732 | 0.85393 | 2.27439 |
| C | -5.73216 | 1.26671 | 1.9778 |
| H | -4.2888 | 1.82948 | 3.43853 |
| H | -6.58937 | 1.68577 | 2.49203 |
| N | -5.09614 | -0.52926 | -1.14106 |
| N | -7.06656 | 0.45677 | 0.07773 |
| S | -6.72066 | -0.34826 | -1.31284 |
| N | 3.51934 | -1.05056 | 1.64063 |
|  |  |  |  |
